# Supplementary figures and images for: Bioactive polysaccharides promote gut immunity via different ways
Source: Royal Society of Chemistry journal article supplement (doi:10.1039/d2fo03181g), 2023-01-01

1 Fig. S1.

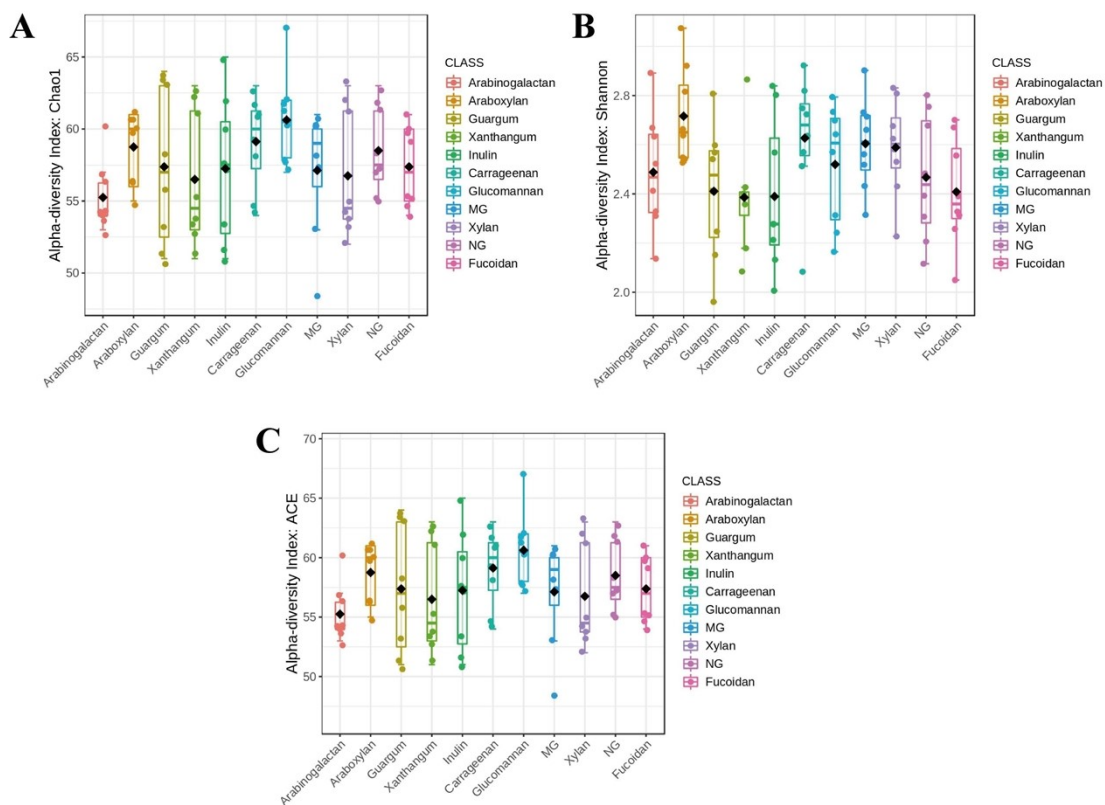

2

3 Fig. S2.

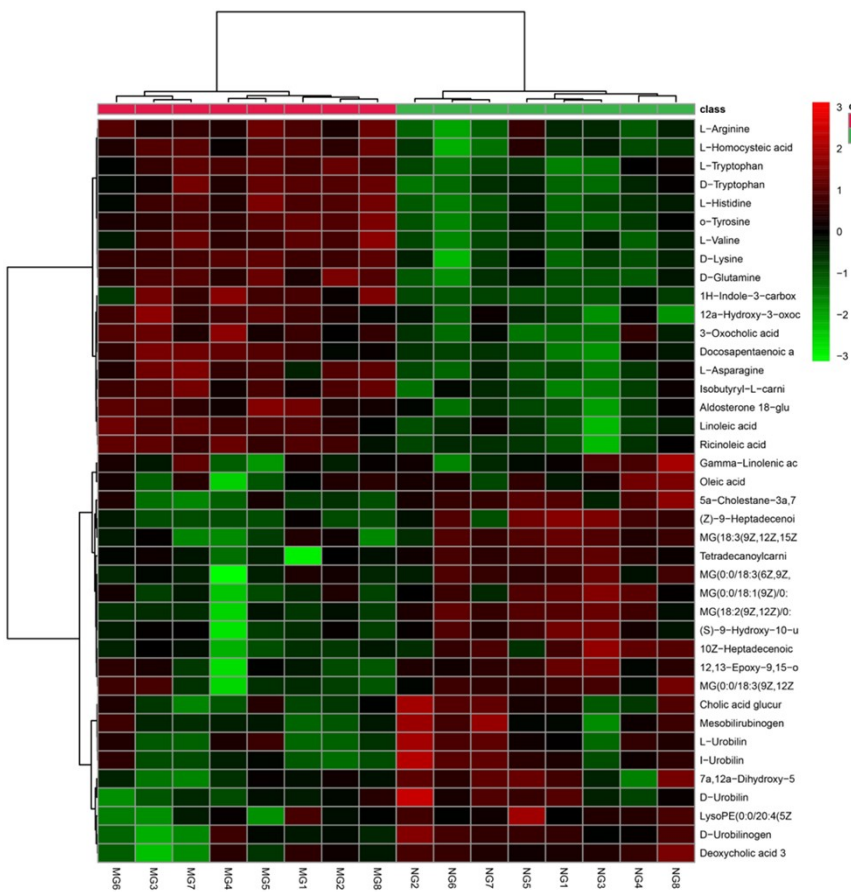

4

Supplement: d2fo03181g1.pdf [file d2fo03181g1.pdf]
